# Supplementary material for: Vinblastine perturbation of tubulin protofilament structure: a computational insight
Source: Royal Society of Chemistry journal article supplement (doi:10.1039/c0cp00594k), 2010-01-01
Supplement: c0cp00594k.pdf [file c0cp00594k.pdf]

## Supplementary Information

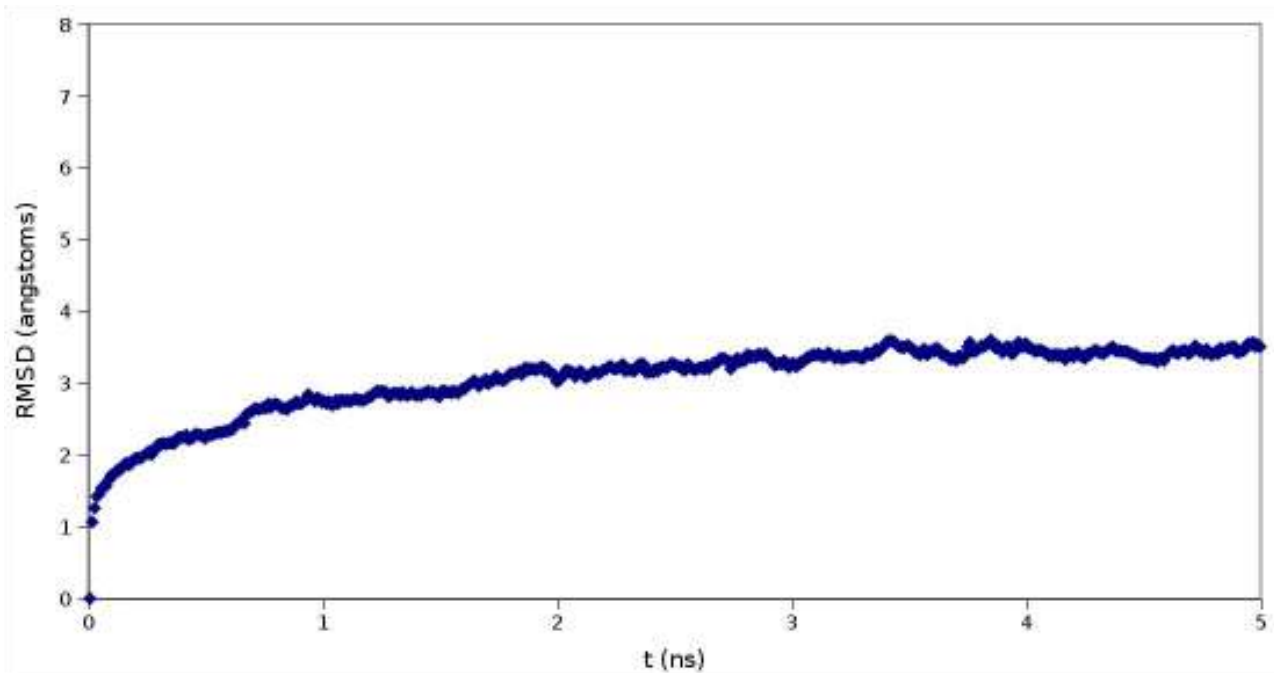

Supplementary fig. S1 RMSD calculated on the  $C\alpha$  atoms of the linear tetramer during the 5 ns simulation.

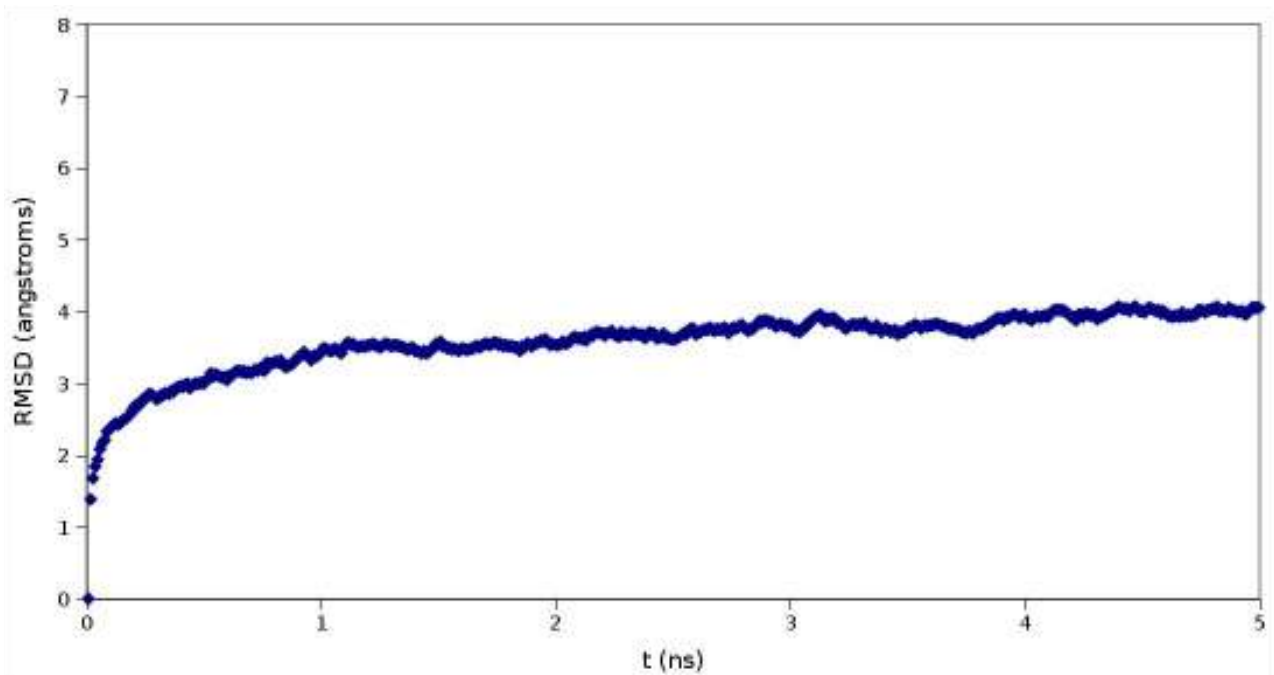

Supplementary fig. S2 RMSD calculated on the  $C\alpha$  atoms of the bent, vinblastine bound, tetramer during the 5 ns simulation.

| Residue  | $\Delta\Delta G$ straight tetramer<br>$\pm$ s.e.m.<br>(kcal mol <sup>-1</sup> ) | $\Delta\Delta G$ VLB as part of $\alpha$<br>subunit $\pm$ s.e.m.<br>(kcal mol <sup>-1</sup> ) | $\Delta\Delta G$ VLB as part of $\beta$<br>subunit $\pm$ s.e.m.<br>(kcal mol <sup>-1</sup> ) |
|----------|---------------------------------------------------------------------------------|-----------------------------------------------------------------------------------------------|----------------------------------------------------------------------------------------------|
| Arg 2    | 10.70 $\pm$ 0.14                                                                | 5.09 $\pm$ 0.15                                                                               | 5.08 $\pm$ 0.15                                                                              |
| Leu 248  | 3.43 $\pm$ 0.06                                                                 | 0.33 $\pm$ 0.01                                                                               | 4.46 $\pm$ 0.06                                                                              |
| Thr 257  | 1.44 $\pm$ 0.09                                                                 | 2.34 $\pm$ 0.06                                                                               | 2.35 $\pm$ 0.06                                                                              |
| Asn 258  | 11.66 $\pm$ 0.12                                                                | 1.56 $\pm$ 0.08                                                                               | 1.54 $\pm$ 0.08                                                                              |
| Tyr 262  | 3.62 $\pm$ 0.05                                                                 | 1.72 $\pm$ 0.05                                                                               | 1.72 $\pm$ 0.05                                                                              |
| Lys 326  | 2.86 $\pm$ 0.08                                                                 | 1.44 $\pm$ 0.09                                                                               | 2.39 $\pm$ 0.10                                                                              |
| Trp 346  | 6.92 $\pm$ 0.08                                                                 | 6.29 $\pm$ 0.07                                                                               | 6.31 $\pm$ 0.07                                                                              |
| Pro 348  | 2.48 $\pm$ 0.05                                                                 | 0.43 $\pm$ 0.01                                                                               | 0.51 $\pm$ 0.01                                                                              |
| Thr 349  | 4.60 $\pm$ 0.09                                                                 | 2.10 $\pm$ 0.09                                                                               | 3.14 $\pm$ 0.10                                                                              |
| Lys 352  | 19.90 $\pm$ 0.17                                                                | 2.69 $\pm$ 0.16                                                                               | 2.58 $\pm$ 0.17                                                                              |
| Glu 69'  | 10.83 $\pm$ 0.20                                                                | 2.60 $\pm$ 0.16                                                                               | 2.64 $\pm$ 0.16                                                                              |
| Gln 94'  | 3.18 $\pm$ 0.11                                                                 | 1.68 $\pm$ 0.10                                                                               | 1.68 $\pm$ 0.10                                                                              |
| Asn 99'  | 7.32 $\pm$ 0.08                                                                 | 1.22 $\pm$ 0.06                                                                               | 1.22 $\pm$ 0.06                                                                              |
| Val 175' | 0.86 $\pm$ 0.05                                                                 | 2.64 $\pm$ 0.05                                                                               | 0.89 $\pm$ 0.03                                                                              |
| Asp 177' | 17.43 $\pm$ 0.18                                                                | 3.21 $\pm$ 0.15                                                                               | 2.72 $\pm$ 0.15                                                                              |
| Thr 178' | 5.63 $\pm$ 0.07                                                                 | 4.60 $\pm$ 0.11                                                                               | 4.84 $\pm$ 0.11                                                                              |
| Tyr 208' | 3.94 $\pm$ 0.07                                                                 | 3.83 $\pm$ 0.06                                                                               | -0.01 $\pm$ 0.00                                                                             |
| Tyr 222' | 4.85 $\pm$ 0.07                                                                 | 3.89 $\pm$ 0.05                                                                               | 0.60 $\pm$ 0.02                                                                              |
| Met 388' | 3.32 $\pm$ 0.05                                                                 | 1.39 $\pm$ 0.05                                                                               | 1.38 $\pm$ 0.05                                                                              |
| Arg 391' | 5.12 $\pm$ 0.06                                                                 | 4.55 $\pm$ 0.21                                                                               | 4.56 $\pm$ 0.21                                                                              |
| Lys 392' | 13.10 $\pm$ 0.17                                                                | 10.69 $\pm$ 0.13                                                                              | 10.70 $\pm$ 0.13                                                                             |
| Phe 394' | 4.12 $\pm$ 0.06                                                                 | 3.52 $\pm$ 0.07                                                                               | 3.51 $\pm$ 0.07                                                                              |
| His 396' | 2.14 $\pm$ 0.06                                                                 | 3.64 $\pm$ 0.09                                                                               | 3.64 $\pm$ 0.09                                                                              |
| Trp 397' | 13.27 $\pm$ 0.08                                                                | 8.87 $\pm$ 0.09                                                                               | 8.87 $\pm$ 0.09                                                                              |

Supplementary table S1 Residues at the tubulin-tubulin interface that are hot or warm spot either in the linear or in the vinblastine bound tetramer.

| c-c3-cd angle     | Force constant<br>(kcal mol <sup>-1</sup> rad <sup>-2</sup> ) |       | Equilibrium angle<br>(degrees) |        |
|-------------------|---------------------------------------------------------------|-------|--------------------------------|--------|
|                   |                                                               | 65.54 |                                | 106.06 |
| x-ca-cc-x torsion | IDIVF                                                         | PK    | PHASE                          | PN     |
|                   | 4                                                             | 20.64 | 180                            | 2      |

Supplementary table S2 Missing vinblastine parameters in the force field GAFF.

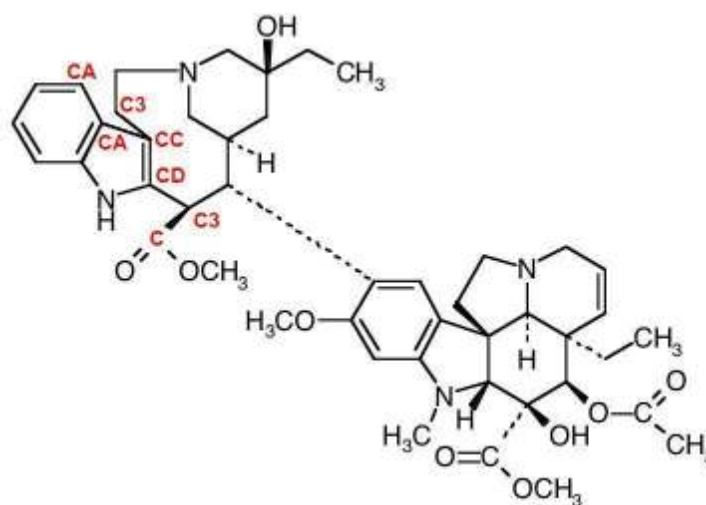

Supplementary figure S3. Angles and torsions for which parameters missed.

$\alpha$

|            | 10         | 20         | 30          | 40          | 50         | 60 |
|------------|------------|------------|-------------|-------------|------------|----|
| MRECISIHVG | QAGVQIGNAC | WELYCLEHGI | QPDGQMPSDK  | TIGGGDDSFN  | TFFSETGAGK |    |
| 70         | 80         | 90         | 100         | 110         | 120        |    |
| HVPRAVFVDL | EPTVIDEVRT | GTyrQLFHPE | QLITGKEDAA  | NNYARGHYTI  | GKEIIDLVLD |    |
| 130        | 140        | 150        | 160         | 170         | 180        |    |
| RIRKLADQCT | GLQGFVVFHS | FGGGTGSQFT | SLLMERLSVD  | YGKKSLEFS   | IYPAPQVSTA |    |
| 190        | 200        | 210        | 220         | 230         | 240        |    |
| VVEPYNSILT | THTTLEHSDC | AFMVDNEAIY | DICRRNLDIE  | RPTYTNLNRL  | IGQIVSSITA |    |
| 250        | 260        | 270        | 280         | 290         | 300        |    |
| SLRFDGALNV | DLTEFQTNLV | PYPRAHFPLA | TYAPVISA EK | AYHEQLSVAE  | ITNACFEPAN |    |
| 310        | 320        | 330        | 340         | 350         | 360        |    |
| QMVKCDPRHG | KYMACCLLYR | GDVVPKDVNA | AIATIKTKRT  | IQFVDWCPTG  | FKVGINYEP  |    |
| 370        | 380        | 390        | 400         | 410         | 420        |    |
| TVVPGGDLAK | VQRAVCMLSN | TTAIAEAWAR | LDHKFDLMYA  | KRAVHVHWYVG | EGMEEGEFSE |    |
| 430        | 440        | 450        |             |             |            |    |
| AREDMAALEK | DYEEVGVDSV | EGEGEEEGEE | Y           |             |            |    |

$\beta$

|            | 10         | 20         | 30         | 40         | 50         | 60 |
|------------|------------|------------|------------|------------|------------|----|
| MREIVHIQAG | QCGNQIGAKF | WEVISDEHGI | DPTGSYHGDS | DLQLERINVY | YNEAAGNKYV |    |
| 70         | 80         | 90         | 100        | 110        | 120        |    |
| PRAILVDLEP | GTMDSVRSGP | FGQIFRPDNF | VFGQSGAGNN | WAKGHYTEGA | ELVDSVLDV  |    |
| 130        | 140        | 150        | 160        | 170        | 180        |    |
| RKESESCDCL | QGFQLTHSLG | GGTGSQMGTL | LISKIREEYP | DRIMNTFSV  | PSPKVSQDVT |    |
| 190        | 200        | 210        | 220        | 230        | 240        |    |
| EPYNATLSVH | QLVENTDETY | CIDNEALYDI | CFRTLKLTTP | TYGDLNHLVS | ATMSGVTTCL |    |
| 250        | 260        | 270        | 280        | 290        | 300        |    |
| RFPGQLNADL | RKLAVNMVPF | PRLHFFMPGF | APLTSRGSQQ | YRALTVPELT | QQMFDKNMM  |    |
| 310        | 320        | 330        | 340        | 350        | 360        |    |
| AACDPRHGRY | LTVAAVFRGR | MSMKEVDEQM | LVNQNKSSY  | FVEWIPNNVK | TAVCDIPPRG |    |
| 370        | 380        | 390        | 400        | 410        | 420        |    |
| LKMSATFIGN | STAIQELFKR | ISEQFTAMFR | RKAFLHWYTG | EGMDEMEFTE | AESNMNDLVS |    |
| 430        | 440        |            |            |            |            |    |
| EYQQYQDATA | DEQGEFEEEG | EEDEA      |            |            |            |    |

Supplementary table S3.

Tubulin sequences of the  $\alpha$  and  $\beta$  subunits (sub Alpha: UniProtKB/Swiss-Prot **P02550** ; sub

Beta: UniProtKB/Swiss-Prot **P02554**).
